# Supplementary material
Source: PubMed Central journal article supplement (PMC4717244)
Supplement: IMM-147-178-s001.pdf [file IMM-147-178-s001.pdf]

**Supplementary Figure 1:** *Shigella dysenteriae* Type 1 infected rhesus macaque - Vasculitis (day 6)

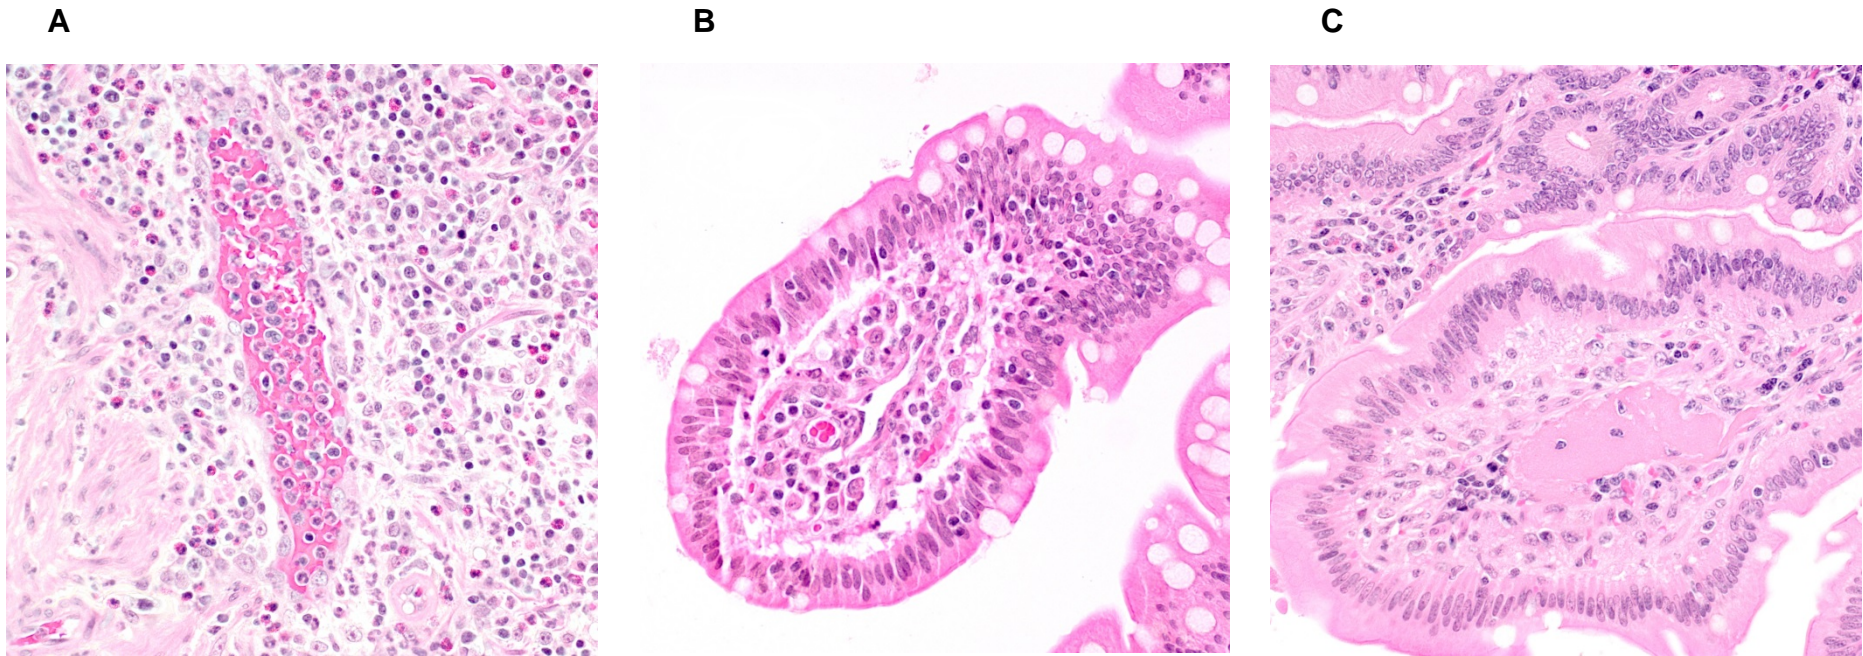

**Legend**

(A) Mural vasculitis predominated by neutrophils admixed with some lymphocytes and eosinophils (H&E, x 400).

(B) Vasculitis in the lamina propria of a villus in the ileum<sup>35</sup> that has inflammatory cells invading and expanding the lamina adventitia and media of the blood vessel wall (H&E, x 400).

(C) Jejunum showed occasional evidence of fibrin thrombi in the lamina propria of villi. There is limited inflammation surrounding the fibrin thrombi (H&E, x 400).



**Supplementary Figure 2:** *Shigella dysenteriae* Type 1 infected rhesus macaque + DG 334 mg - Jejunum & Ileum (day 6)

**A**

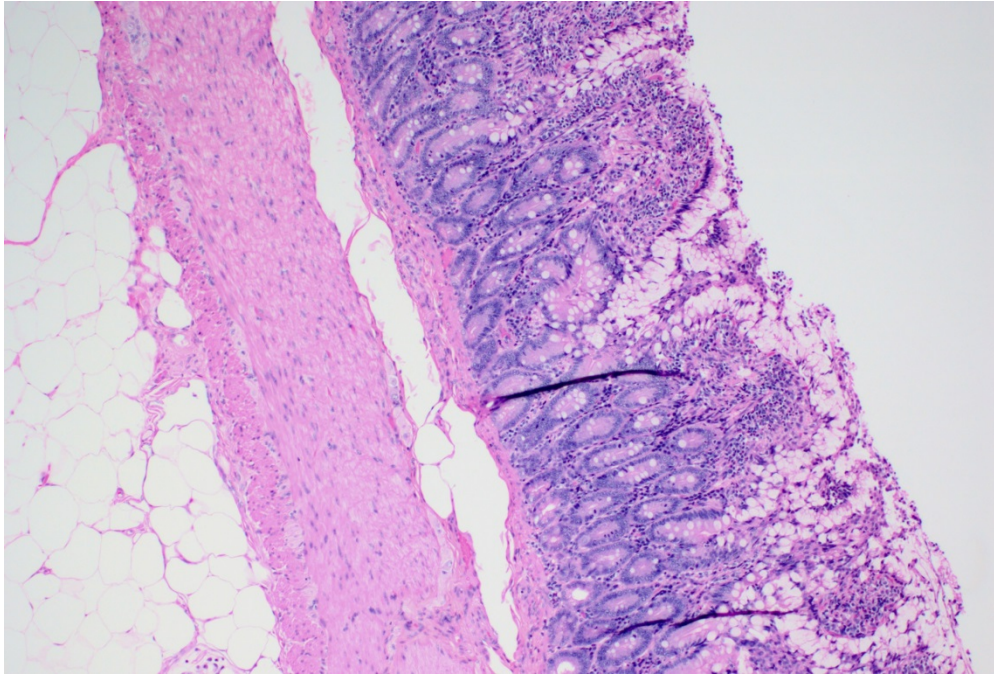

**B**

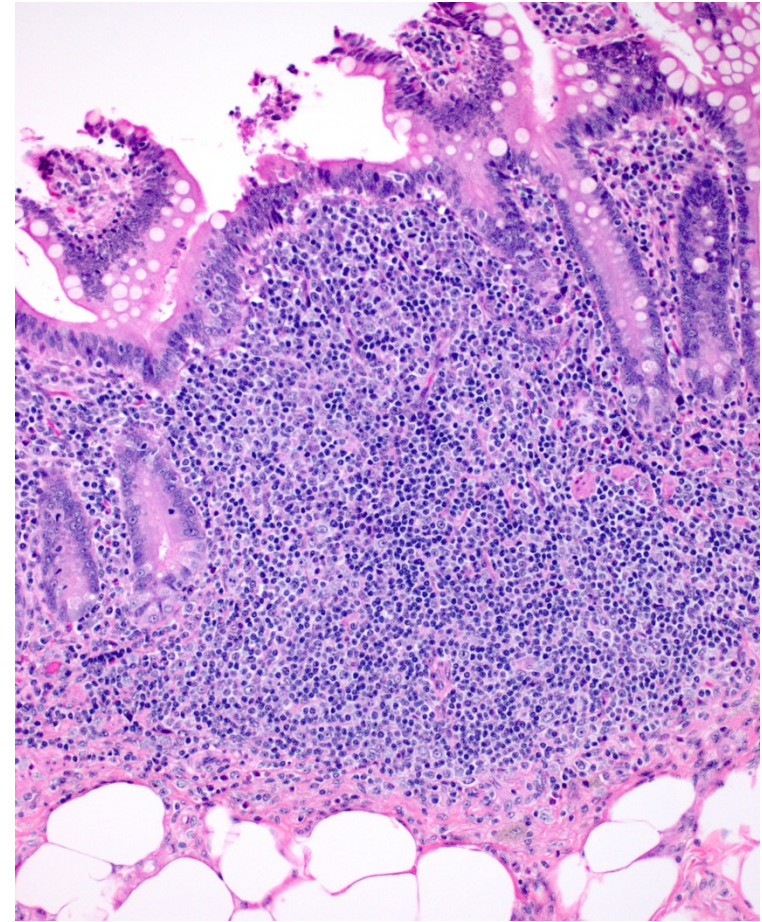

**Legend**

(A) Jejunum. There is no damage to the mucosa. The background lymphocyte infiltrate is within normal limits for rhesus macaque (H&E, x 100).

(B) Ileum. An intact Peyer's patch in the ileum with an intact mucosa (H&E, x 200).

**Supplementary Table 1:  
Colon mRNA summary data**

| Colon (day 6) | mRNA copies/10 <sup>5</sup> GAPDH (mean ± SEM) |                                |                |
|---------------|------------------------------------------------|--------------------------------|----------------|
|               | Control                                        | <i>Shigella</i> (Sh) infection | Sh + DG 334 mg |
| IL-8          | 3.3 ± 0.8                                      | 340 ± 82                       | 78 ± 23        |
| IL-6          | 0.3 ± 0.08                                     | 12.4 ± 2.9                     | 2.1 ± 0.6      |
| IL-1β         | 22.6 ± 1.8                                     | 203 ± 53                       | 79 ± 24        |
| IFN-γ         | 6.75 ± 1.61                                    | 21.42 ± 4                      | 11.25 ± 1.35   |
| TNF-α         | 4.48 ± 0.63                                    | 11.52 ± 2.11                   | 7.7 ± 0.95     |
| IL-10         | 5.3 ± 1.14                                     | 10.43 ± 1.53                   | 9.6 ± 1.64     |
| FoxP3         | 30.6 ± 7.7                                     | 20.8 ± 2.6                     | 32.3 ± 4.6     |
| TGF-β         | 4,498 ± 792                                    | 4,092 ± 317                    | 4,676 ± 707    |

Quantitative mRNA RT-PCR analysis of ascending colon, transverse colon and descending colon (pooled data) as shown in Figures 4. The *P* values for IL-8, IL-6, IL-1β and IFN-γ are shown in Figure 4. TNF-α, IL-10, FoxP3 and TGF-β did not change significantly with either *Shigella* infection or DG treatment.

**Supplementary Table 2  
Rectum mRNA summary data**

| Rectum (day 6) | mRNA copies/10 <sup>5</sup> GAPDH (mean ± SEM) |                                |                |
|----------------|------------------------------------------------|--------------------------------|----------------|
|                | Control                                        | <i>Shigella</i> (Sh) infection | Sh + DG 334 mg |
| IL-8           | 1.85 ± 0.37                                    | 60 ± 15                        | 6.02 ± 2.16    |
| IL-1β          | 10.9 ± 3.9                                     | 25.9 ± 2.9                     | 10.5 ± 1.9     |
| IFN-γ          | 1.01 ± 0.17                                    | 4.28 ± 0.71                    | 2.07 ± 0.72    |
| IL-6           | 0.46 ± 0.15                                    | 1.38 ± 0.38                    | 1.02 ± 0.13    |
| TNF-α          | 5.73 ± 0.69                                    | 3.98 ± 0.63                    | 6.4 ± 1.08     |
| IL-10          | 1.41 ± 0.11                                    | 2.52 ± 0.24                    | 3.15 ± 0.45    |
| FoxP3          | 8.81 ± 0.9                                     | 11.4 ± 3.7                     | 8.44 ± 2.8     |
| TGF-β          | 1,900 ± 229                                    | 1,261 ± 77                     | 1,868 ± 143    |

Quantitative mRNA RT-PCR analysis of rectum as shown in Figure 5.

The *P* values for IL-8, IL-1β and IFN-γ are shown in Figure 5. IL-6, TNF-α, IL-10, FoxP3 and TGF-β did not change significantly with either *Shigella* infection or DG treatment.

### Supplementary Table 3

#### Mesenteric lymph node mRNA summary data

| Mesenteric lymph node (day 6) | mRNA copies/10 <sup>5</sup> GAPDH (mean ± SEM) |                                |                |
|-------------------------------|------------------------------------------------|--------------------------------|----------------|
|                               | Control                                        | <i>Shigella</i> (Sh) infection | Sh + DG 334 mg |
| <b>IL-8</b>                   | 32.6 ± 20                                      | 7.9 ± 1.5                      | 3.1 ± 1.4      |
| <b>IL-6</b>                   | 29.9 ± 14.2                                    | 14.9 ± 1.2                     | 16.7 ± 4.6     |
| <b>IL-1β</b>                  | 31.9 ± 3                                       | 52 ± 8.6                       | 42.8 ± 3.7     |
| <b>IFN-γ</b>                  | 29.6 ± 8.7                                     | 16.3 ± 4.7                     | 12.3 ± 3.8     |
| <b>TNF-α</b>                  | 51.6 ± 15.5                                    | 23.7 ± 5.4                     | 27.1 ± 6.7     |
| <b>IL-10</b>                  | 11.4 ± 5.2                                     | 14.3 ± 2.8                     | 20.4 ± 9.2     |
| <b>FoxP3</b>                  | 151 ± 32 **                                    | 39 ± 9 **                      | 71 ± 24        |
| <b>TGF-β</b>                  | 10,513 ± 4,997                                 | 6,648 ± 798                    | 8,463 ± 1,052  |

\*\*  $P < 0.01$  (2-tailed Mann-Whitney test)

Quantitative mRNA RT-PCR analysis of mesenteric lymph nodes for IL-8, IL-6, IL-1β, IFN-γ, TNF-α, IL-10, FoxP3 & TGF-β expressed as mRNA copies/10<sup>5</sup> GAPDH.

FoxP3 was reduced by *Shigella* infection and DG (334 mg) had no effect.

IL-8, IL-6, IL-1β, IFN-γ, TNF-α, IL-10 and TGF-β did not change significantly with either *Shigella* infection or DG treatment.

DG (214 mg) had no effect on any chemokine/cytokine/mediator measured in mesenteric lymph nodes (data not shown).

The lack of an increase in any pro-inflammatory cytokine equates to <20 ng/ml of *Shigella* LPS being present in the NHP gut mesenteric lymph nodes<sup>26</sup>.
